# Supplementary material for: Filter inference: A scalable nonlinear mixed effects inference approach for snapshot time series data
Source: PubMed Central journal article supplement (PMC10237648; doi:10.1371/journal.pcbi.1011135), 2023-05-22
Supplement: pcbi.1011135.s003.pdf [file pcbi.1011135.s003.pdf]

### S3 Text. Estimation of variance estimation error.

We estimate the variance at time point  $t_j$  using

$$\hat{\sigma}_j^2 = \frac{1}{n_j - 1} \sum_{i=1}^{n_j} (y_{ij} - \hat{\mu}_j)^2,$$

where  $n_j$  denotes the number of measurements at  $t_j$  and  $\hat{\mu}_j = \sum_i y_{ij}/n_j$  denotes their mean. Assuming that  $y_{ij}$  are drawn from a Gaussian distribution  $\mathcal{N}(y|\mu_j, \sigma_j^2)$  with mean  $\mu_j$  and variance  $\sigma_j^2$ , the normalised variance estimator follows a  $\chi^2$ -distribution with  $n_j - 1$  degrees of freedom

$$\frac{n_j - 1}{\sigma_j^2} \hat{\sigma}_j^2 \sim \chi_{n_j - 1}^2.$$

The variance of a  $\chi_{n_j - 1}^2$  random variable is  $2(n_j - 1)$ . As a result, we can estimate the standard deviation of  $\hat{\sigma}_j^2$  using

$$\sqrt{\text{Var} [\hat{\sigma}_j^2]} = \sigma_j^2 \sqrt{\frac{2}{n_j - 1}} \approx \hat{\sigma}_j^2 \sqrt{\frac{2}{n_j - 1}}.$$

At  $t = 0$ , the measurement distribution in Fig [3A](#) happens to be Gaussian, and the above estimate is unbiased.
