# Supplementary material for: Filter inference: A scalable nonlinear mixed effects inference approach for snapshot time series data
Source: PubMed Central journal article supplement (PMC10237648; doi:10.1371/journal.pcbi.1011135), 2023-05-22
Supplement: pcbi.1011135.s005.pdf [file pcbi.1011135.s005.pdf]

**S5 Text. Estimation of posterior average of population distribution.**

Formally, the average of the population distribution over the posterior distribution, also known as the posterior predictive population distribution, is defined as

$$p(\psi|\mathcal{D}) = \mathbb{E}_{\theta|\mathcal{D}}[p(\psi|\theta)] = \int d\theta p(\psi|\theta) p(\theta|\mathcal{D}).$$

While the integral is generally difficult, or impossible, to compute analytically, the above equation implicitly defines a joint distribution of the individual-level parameters and the population-level parameters,  $p(\psi, \theta|\mathcal{D}) = p(\psi|\theta) p(\theta|\mathcal{D})$ . To sample from  $p(\psi|\mathcal{D})$ , we can sample from  $p(\psi, \theta|\mathcal{D})$  and marginalise over the sampled population-level parameters afterwards. In particular, we first sample a  $\theta$  from  $p(\theta|\mathcal{D})$ , and then draw a  $\psi$  from  $p(\psi|\theta)$  using the sampled  $\theta$ . The histogram over the sampled  $\psi$  converges to the posterior predictive population distribution as the number of samples tends to infinity. In practice, samples from  $p(\theta|\mathcal{D})$  are generated by sampling with replacement from the MCMC posterior samples.
