# Supplementary material for: Filter inference: A scalable nonlinear mixed effects inference approach for snapshot time series data
Source: PubMed Central journal article supplement (PMC10237648; doi:10.1371/journal.pcbi.1011135), 2023-05-22
Supplement: pcbi.1011135.s010.pdf [file pcbi.1011135.s010.pdf]

**S10 Text. Equivalence of filter inference with identifiable summary statistics-based filters and ABC based on the same summary statistics.**

Let  $Y_1, \dots, Y_N$  be  $N$  i.i.d. random, real-valued variables drawn from the data-generating distribution  $q(y)$ . Let  $q$  have nonzero variance,  $\text{Var}[Y] > 0$ . Let  $\tilde{Y}_1, \dots, \tilde{Y}_S$  be  $S$  i.i.d. random, real-valued variables drawn from the model  $p(y|\theta)$ . Let further  $\mathcal{K}_\varepsilon(X - \tilde{X})$  be a kernel with an error margin  $\varepsilon$ , used in ABC to quantify the distance between the data summary statistic  $X = X(Y_1, \dots, Y_N)$  and the simulated summary statistic  $\tilde{X} = X(\tilde{Y}_1, \dots, \tilde{Y}_S)$ . Let the kernel converge to a Dirac delta distribution up to a proportionality factor as the error margin goes to zero,  $\lim_{\varepsilon \rightarrow 0} \mathcal{K}_\varepsilon(X - \tilde{X}) \propto \delta(X - \tilde{X})$ . Let further  $p(y|\tilde{X}_1, \dots, \tilde{X}_K)$  denote a filter defined by  $K$  summary statistics. Let  $p(\mathcal{D}|\tilde{X}_1, \dots, \tilde{X}_K) = \prod_{i=1}^N p(Y_i|\tilde{X}_1, \dots, \tilde{X}_K)$  denote its likelihood. Let  $p(y|\tilde{X}_1, \dots, \tilde{X}_K)$  be a *summary statistics-based filter*, when the maximum likelihood estimates of the filter likelihood converge to the summary statistics of the data  $X_1, \dots, X_K$  as  $N \rightarrow \infty$ . Let  $p(y|\tilde{X}_1, \dots, \tilde{X}_K)$  be an *identifiable filter*, when the filter likelihood has a unique maximum, whose curvature tends to infinity in the limit  $N \rightarrow \infty$ . Then, an identifiable summary statistics-based filter converges to a Dirac delta distribution between the data summary statistics and the simulated summary statistics up to a proportionality factor as the number of measurements goes to infinity,  $\lim_{N \rightarrow \infty} p(\mathcal{D}|\tilde{X}_1, \dots, \tilde{X}_K) \propto \prod_{k=1}^K \delta(X_k - \tilde{X}_k)$ . As a result, filter inference with an identifiable summary statistics-based filter is equivalent to ABC based on the same summary statistics,  $\prod_{k=1}^K \mathcal{K}_\varepsilon(X_k - \tilde{X}_k)$ , in the limit  $N \rightarrow \infty$  and  $\varepsilon \rightarrow 0$ .

**Proof:** The MLEs of a summary statistics-based filter recover the summary statistics of the data in the limit  $N \rightarrow \infty$ . The MLEs of an identifiable filter are the unique maximum of the filter likelihood, whose curvature tends to infinity as  $N \rightarrow \infty$ . As a result, the filter likelihood must be proportional to a Dirac delta distribution at the summary statistics of the data in the limit  $N \rightarrow \infty$ ,  $\lim_{N \rightarrow \infty} p(\mathcal{D}|\tilde{X}_1, \dots, \tilde{X}_K) \propto \prod_{k=1}^K \delta(X_k - \tilde{X}_k)$ . The kernel from ABC also converges to a Dirac delta distribution up to a proportionality factor when the error margin goes to zero,  $\lim_{\varepsilon \rightarrow 0} \prod_{k=1}^K \mathcal{K}_\varepsilon(X_k - \tilde{X}_k) = \prod_{k=1}^K \delta(X_k - \tilde{X}_k)$ . As a result, filter inference with an identifiable summary statistics-based filter is equivalent to ABC based on the same summary statistics in the limit  $N \rightarrow \infty$  and  $\varepsilon \rightarrow 0$ .
