# Supplementary material for: Filter inference: A scalable nonlinear mixed effects inference approach for snapshot time series data
Source: PubMed Central journal article supplement (PMC10237648; doi:10.1371/journal.pcbi.1011135), 2023-05-22
Supplement: pcbi.1011135.s011.pdf [file pcbi.1011135.s011.pdf]

**S1 Table. Convergence statistics of MCMC chains during the parameter estimation of the early cancer growth model.**

|                               | 90 IDs (NLME) | 90 IDs | 270 IDs | 810 IDs | 2430 IDs |
|-------------------------------|---------------|--------|---------|---------|----------|
| $\hat{R}$ of $\mu_{y_0}$      | 1.00          | 1.00   | 1.00    | 1.00    | 1.00     |
| $\hat{R}$ of $\sigma_{y_0}$   | 1.00          | 1.00   | 1.00    | 1.00    | 1.00     |
| $\hat{R}$ of $\mu_\lambda$    | 1.00          | 1.00   | 1.00    | 1.00    | 1.00     |
| $\hat{R}$ of $\sigma_\lambda$ | 1.00          | 1.00   | 1.00    | 1.00    | 1.00     |
| $\hat{R}$ of $\mu_\sigma$     | 1.00          | 1.00   | 1.00    | 1.00    | 1.00     |
| # divergences                 | 0             | 0      | 0       | 0       | 0        |
