# Supplementary material for: Filter inference: A scalable nonlinear mixed effects inference approach for snapshot time series data
Source: PubMed Central journal article supplement (PMC10237648; doi:10.1371/journal.pcbi.1011135), 2023-05-22
Supplement: pcbi.1011135.s012.pdf [file pcbi.1011135.s012.pdf]

**S2 Table.** Convergence statistics of MCMC chains during the parameter estimation of the EGF pathway model.

|                   | $\hat{R}$ |
|-------------------|-----------|
| $\mu_p$           | 1.00      |
| $\sigma_p$        | 1.00      |
| $\mu_{k_{on}}$    | 1.00      |
| $\sigma_{k_{on}}$ | 1.00      |
| $\mu_{k_{off}}$   | 1.00      |
| $\mu_{k_{deg,r}}$ | 1.00      |
| $\mu_{k_{deg,a}}$ | 1.00      |
| # divergences     | 0         |
