# Supplementary material for: Filter inference: A scalable nonlinear mixed effects inference approach for snapshot time series data
Source: PubMed Central journal article supplement (PMC10237648; doi:10.1371/journal.pcbi.1011135), 2023-05-22
Supplement: pcbi.1011135.s013.pdf [file pcbi.1011135.s013.pdf]

**S3 Table. Number of log-posterior evaluations.** The table shows the total number of times the log-posterior is evaluated during the inferences in Fig 9.

|                     | 90 IDs | 270 IDs | 810 IDs | 2430 IDs | 2400 IDs (EGF) |
|---------------------|--------|---------|---------|----------|----------------|
| NUTS (warm-up)      | 20,000 | 25,626  | 33,059  | 53,589   | 134,413        |
| NUTS (sampling)     | 14,985 | 14,985  | 30,969  | 30,969   | 62,937         |
| NUTS (total)        | 34,985 | 40,611  | 64,028  | 84,558   | 197,350        |
| Metropolis-Hastings | 90,000 | 90,000  | 90,000  | 90,000   | 180,000        |
