# Supplementary material for: Filter inference: A scalable nonlinear mixed effects inference approach for snapshot time series data
Source: PubMed Central journal article supplement (PMC10237648; doi:10.1371/journal.pcbi.1011135), 2023-05-22
Supplement: pcbi.1011135.s014.pdf [file pcbi.1011135.s014.pdf]

**S4 Table. Grid search results: ESS of MH.** We ran each MH algorithm with 3 chains for 5000 iterations and computed the ESS after discarding the first 2500 iterations. The reference variances of the filter posteriors are reported in [S5 Table](#) and [S6 Table](#).

| Scale factor | 90 IDs     | 270 IDs   | 810 IDs   | 2430 IDs   | 2400 (EGF)  |
|--------------|------------|-----------|-----------|------------|-------------|
| 1.4          | 71         | <b>24</b> | 4         | 3.3        | 3.14        |
| 1.2          | 71         | 15        | 7         | 3.6        | <b>3.32</b> |
| 1            | <b>115</b> | 12        | <b>11</b> | 3.3        | 3.04        |
| 0.8          | 63         | 16        | 6         | 3.2        | 3.22        |
| 0.6          | 82         | 7         | 6         | 3.6        | 3.13        |
| 0.4          | 63         | 8         | 6         | <b>3.8</b> | 3.08        |
| 0.2          | 52         | 5         | 5         | 3.4        | 3.29        |
