# Supplementary material for: Filter inference: A scalable nonlinear mixed effects inference approach for snapshot time series data
Source: PubMed Central journal article supplement (PMC10237648; doi:10.1371/journal.pcbi.1011135), 2023-05-22
Supplement: pcbi.1011135.s015.pdf [file pcbi.1011135.s015.pdf]

**S5 Table. Variances of filter posteriors: Early cancer model.**

|                              | 90 IDs | 270 IDs | 810 IDs | 2430 IDs |
|------------------------------|--------|---------|---------|----------|
| $\text{Var}[\mu_{y_0}]$      | 0.086  | 0.036   | 0.02    | 0.017    |
| $\text{Var}[\sigma_{y_0}]$   | 0.012  | 0.0084  | 0.0046  | 0.0032   |
| $\text{Var}[\mu_\lambda]$    | 0.072  | 0.036   | 0.018   | 0.0014   |
| $\text{Var}[\sigma_\lambda]$ | 0.0082 | 0.00456 | 0.0033  | 0.0024   |
| $\text{Var}[\mu_\sigma]$     | 0.0089 | 0.1176  | 0.0082  | 0.0096   |
