# Supplementary material for: Filter inference: A scalable nonlinear mixed effects inference approach for snapshot time series data
Source: PubMed Central journal article supplement (PMC10237648; doi:10.1371/journal.pcbi.1011135), 2023-05-22
Supplement: pcbi.1011135.s016.pdf [file pcbi.1011135.s016.pdf]

S6 Table. Variances of filter posterior: EGF pathway model.

|                          | Variance  |
|--------------------------|-----------|
| $\mu_p$                  | 0.00005   |
| $\sigma_p$               | 0.0001    |
| $\mu_{k_{\text{on}}}$    | 0.00006   |
| $\sigma_{k_{\text{on}}}$ | 0.00004   |
| $\mu_{k_{\text{deg},r}}$ | 0.0000008 |
| $\mu_{k_{\text{deg},a}}$ | 0.000002  |
