# Supplementary material for: Filter inference: A scalable nonlinear mixed effects inference approach for snapshot time series data
Source: PubMed Central journal article supplement (PMC10237648; doi:10.1371/journal.pcbi.1011135), 2023-05-22

**S1 Fig. IIV-noise identifiability of early cancer growth model I.** The figure shows inference results of the early cancer model using NLME inference and filter inference with a Gaussian filter and  $S = 100$  simulated individuals. The parameters are estimated from snapshot datasets with measurements from  $N = 90$ ,  $N = 270$ ,  $N = 810$ ,  $N = 2430$  individuals. The measurements are generated for 6 time points between 0 and 0.6 as described in [Early cancer growth model inference](#). The first row shows the posterior distributions inferred from measurements of  $N = 90$  individuals. The second, third and fourth row analogously show the results for  $N = 270$ ,  $N = 810$  and  $N = 2430$ . The filter posteriors are illustrated in blue and the NLME posteriors are illustrated in red. The prior distributions are illustrated by black dashed lines and the data-generating parameter values are depicted by solid black lines.

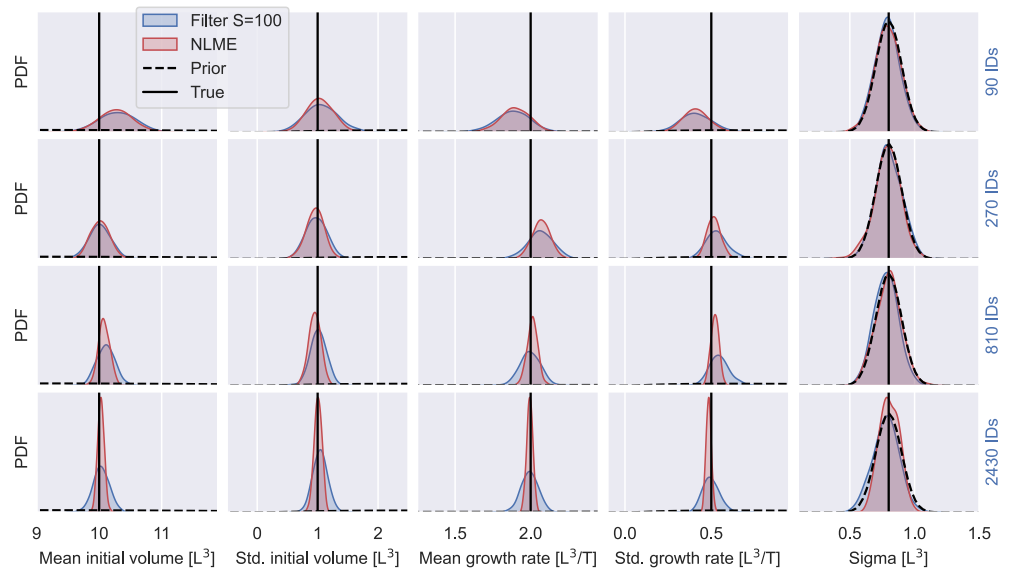

Supplement: pcbi.1011135.s017.pdf [file pcbi.1011135.s017.pdf]
