# Supplementary material for: Filter inference: A scalable nonlinear mixed effects inference approach for snapshot time series data
Source: PubMed Central journal article supplement (PMC10237648; doi:10.1371/journal.pcbi.1011135), 2023-05-22

**S2 Fig. Early cancer growth measurement distribution.** The figure is an extension of [S1 Fig](#) and shows the measurement distribution  $p(y|\theta, t)$  of the early cancer growth model at  $t = 0$ ,  $t = 0.3$  and  $t = 0.6$  for three different sets of parameter values. The measurement distribution corresponding to the data-generating parameters,  $\theta = (\mu_{y_0}, \sigma_{y_0}, \mu_\lambda, \sigma_\lambda, \mu_\sigma) = (10, 1, 2, 0.5, 0.8)$ , is shown in black. A measurement distribution that overestimates the IIV contributions to the measurement variability,  $\theta = (10, 1.195, 2, 0.5, 0.47)$ , is illustrated in blue, and a measurement distribution that overestimates the noise contributions to the measurement variability,  $\theta = (10, 0.7, 2, 0.5, 1.127)$ , is illustrated in red.

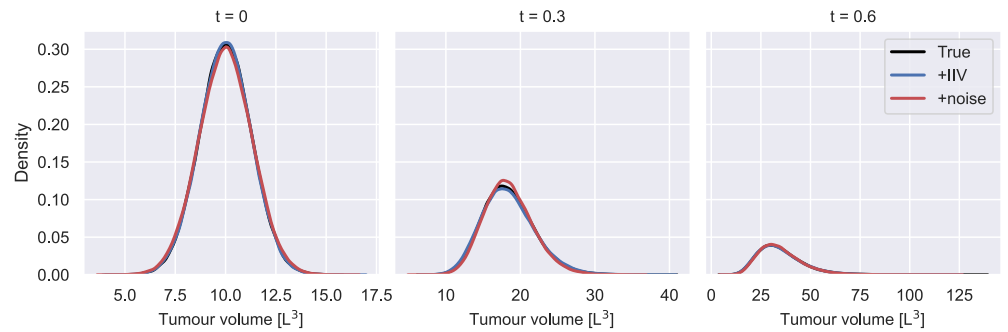

Supplement: pcbi.1011135.s018.pdf [file pcbi.1011135.s018.pdf]
