# Supplementary material for: Filter inference: A scalable nonlinear mixed effects inference approach for snapshot time series data
Source: PubMed Central journal article supplement (PMC10237648; doi:10.1371/journal.pcbi.1011135), 2023-05-22

**S3 Fig. IIV-noise identifiability of early cancer growth model II.** The figure is an extension of [S1 Fig](#) and shows filter inference results for the early cancer growth model from 60 000 snapshot measurements using Gaussian filters with  $S = 5\,000$  simulated individuals. The prior distributions are illustrated by black dashed lines and the data-generating parameter values are depicted by solid black lines.

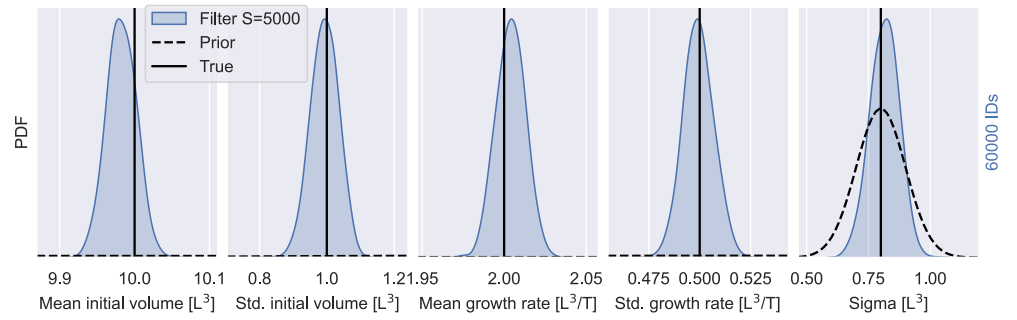

Supplement: pcbi.1011135.s019.pdf [file pcbi.1011135.s019.pdf]
